# Supplementary material for: Deregulation of SET is Associated with Tumor Progression and Predicts Adverse Outcome in Patients with Early-Stage Colorectal Cancer
Source: MDPI journal article supplement (doi:10.3390/jcm8030346), 2019-03-12
Supplement: s1 [file s1]

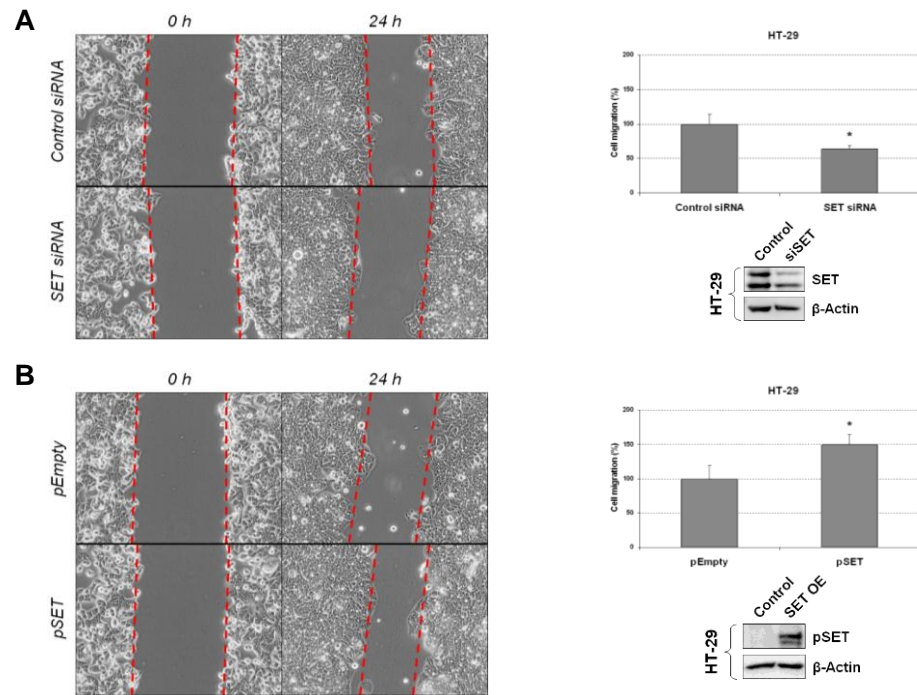

**Supplementary Figure 1**

**Figure S1. SET modulates cell migration in CRC cells.** Wound- healing assay showing migration in HT-29 cells after ectopic (A) SET silencing or (B) SET overexpression. Dashed lines represent the migration border; OE: overexpression; \* $P < 0.05$ ; \*\* $P < 0.01$ .

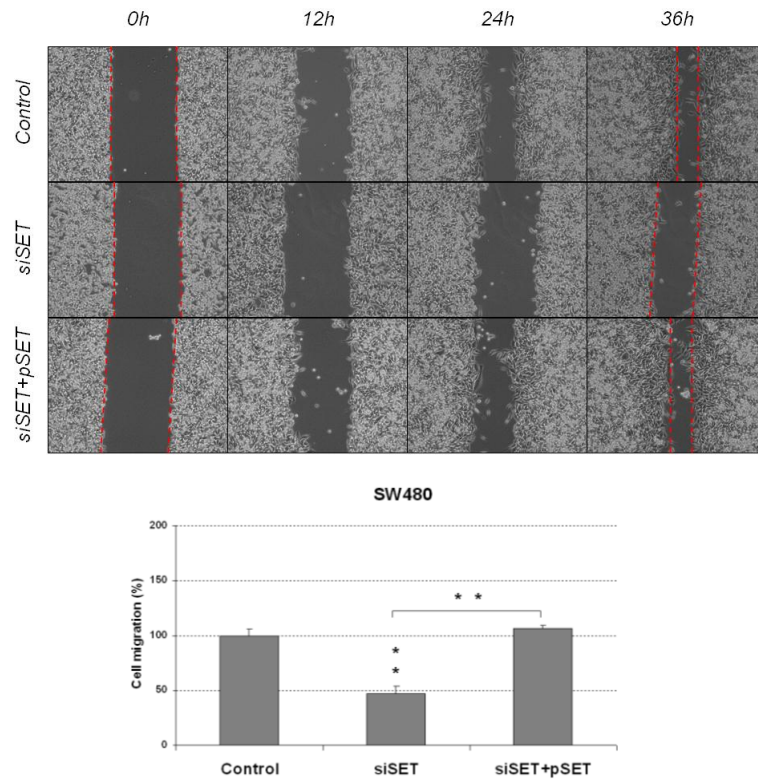

**Supplementary Figure 2**

**Figure S2.** Time-course analysis of a wound healing assay in SW480 cells with SET silenced and with or without ectopic SET expression. Dashed lines represent the migration border; OE: overexpression; \* $P < 0.05$ ; \*\* $P < 0.01$ .

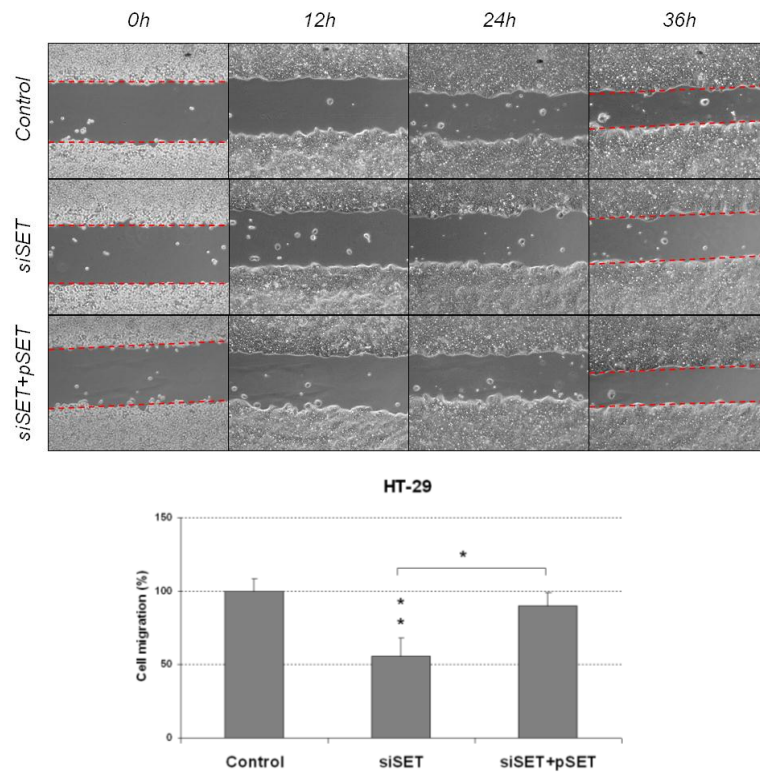

**Supplementary Figure 3**

**Figure S3.** Time-course analysis of a wound healing assay in HT-29 cells with SET silenced and with or without ectopic SET expression. Dashed lines represent the migration border; OE: overexpression; \* $P < 0.05$ ; \*\* $P < 0.01$ .

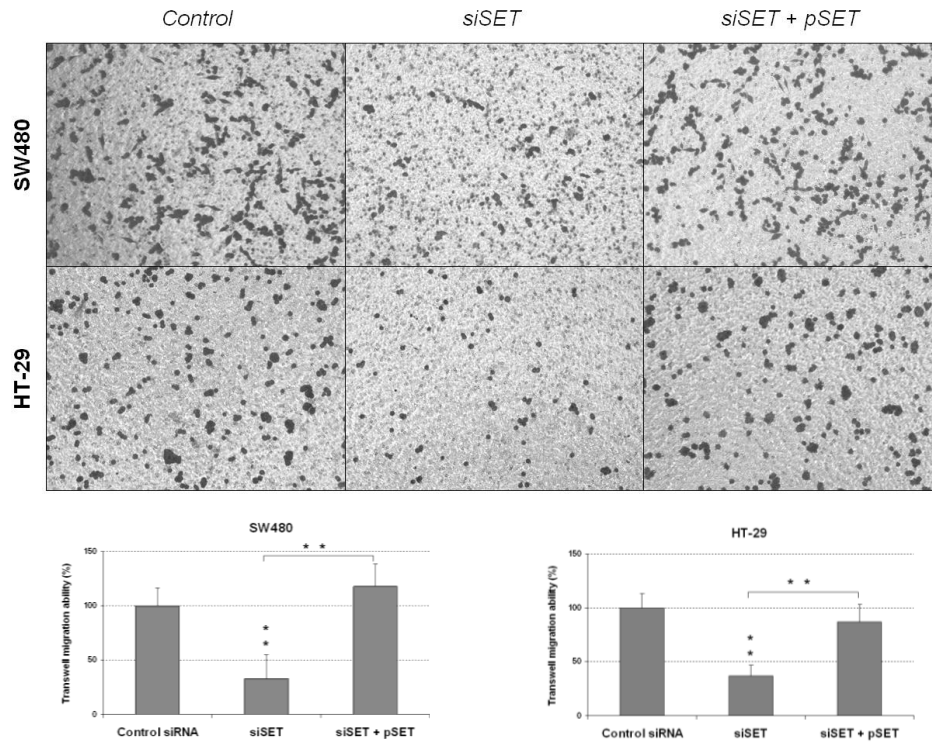

**Supplementary Figure 4**

**Figure S4. Ectopic SET expression restores transwell migration in CRC cells with SET silenced.** Transwell migration assay in SW480 and HT-29 cells after SET silencing with or without SET overexpression; \*  $P < 0.05$ ; \*\*  $P < 0.01$ .

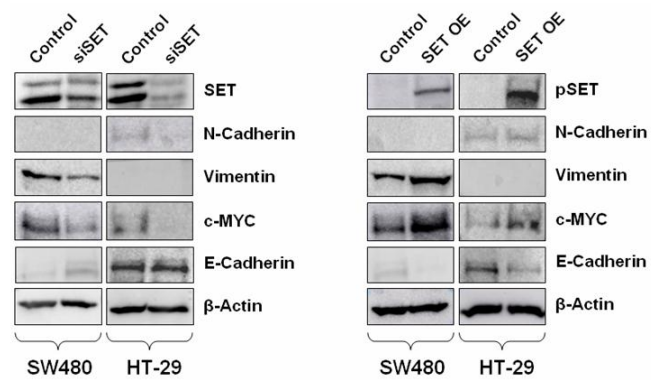

**Supplementary Figure 5**

**Figure S5. SET modulates the expression of c-MYC and EMT proteins.**

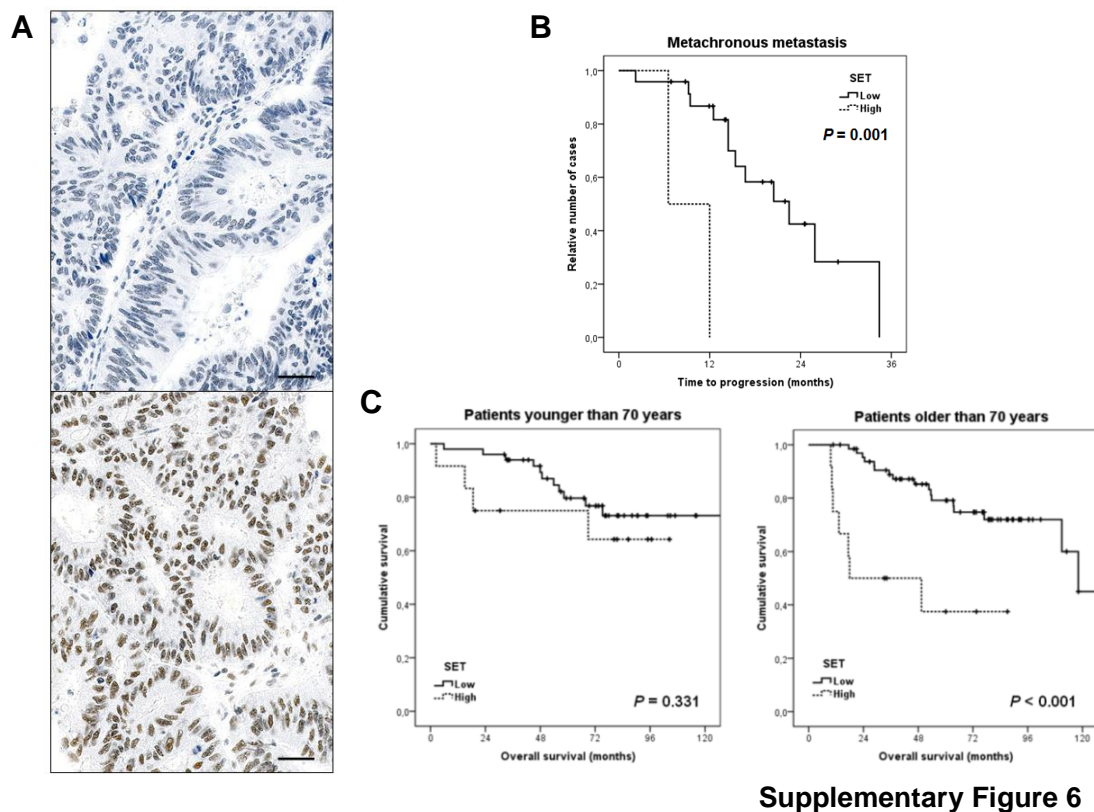

**Supplementary Figure 6**

**Figure S6.** (A) Immunohistochemical detection of SET expression in patients with early-stage CRC showing SET-negative and -positive stainings. The line shows 25  $\mu$ m. Original magnification x400. (B) Time to progression from metastatic diagnosis in the subgroup of patients with metachronous metastases (C) Kaplan-Meier analyses of OS in the subgroups of patients younger ( $N = 62$ ) and older than 70 years ( $N = 79$ ).

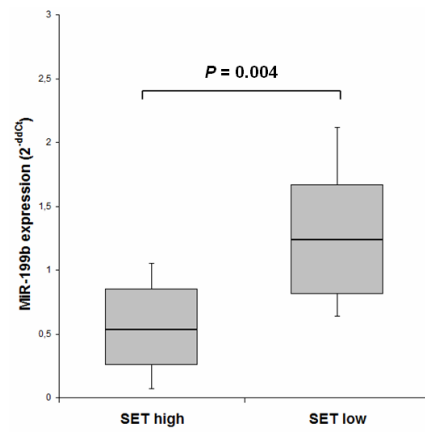

### Supplementary Figure 7

**Figure S7.** Box-plot showing miR-199b expression levels in patients with ( $N = 7$ ) and without ( $N = 22$ ) SET overexpression.

**Table S1.** Clinical and molecular characteristics of a series of 231 CRC patients without metastatic disease at diagnosis.

|                                |        | No. (%)    |
|--------------------------------|--------|------------|
| Sex                            |        |            |
|                                | Male   | 155 (62.8) |
|                                | Female | 92 (37.2)  |
| Age                            |        |            |
|                                | <70    | 86 (36.4)  |
|                                | ≥70    | 150 (62.8) |
| ECOG                           |        |            |
|                                | 0-1    | 205 (91.9) |
|                                | 2-3    | 18 (8.1)   |
| T                              |        |            |
|                                | 1      | 7 (2.8)    |
|                                | 2      | 48 (19.4)  |
|                                | 3      | 155 (62.7) |
|                                | 4      | 29 (11.8)  |
|                                | x      | 8 (3.3)    |
| N                              |        |            |
|                                | 0      | 117 (47.4) |
|                                | 1      | 67 (27.1)  |
|                                | 2      | 44 (17.8)  |
|                                | x      | 19 (7.7)   |
| Stage                          |        |            |
|                                | I      | 39 (15.8)  |
|                                | II     | 78 (31.6)  |
|                                | III    | 130 (52.6) |
| Site of primary tumor          |        |            |
|                                | Colon  | 165 (68.5) |
|                                | Rectum | 76 (31.5)  |
| Progression (local or distant) |        |            |
|                                | No     | 156 (63.2) |
|                                | Yes    | 91 (36.8)  |



**Table S2.** Association of ECOG status with age and stage parameters.

| ECOG  | No. Cases | No. ECOG 0-1 (%) | No. ECOG 2-3 (%) | <i>p</i> |
|-------|-----------|------------------|------------------|----------|
| Age   | 223       | 205              | 18               | 0.060    |
| <70   | 83        | 80 (81.9)        | 3 (18.1)         |          |
| >70   | 140       | 125 (87.1)       | 15 (12.9)        |          |
| Stage | 223       | 205              | 18               | 0.014    |
| I-II  | 99        | 96 (89)          | 3 (11)           |          |
| III   | 124       | 109 (82.3)       | 15 (17.7)        |          |

**Table S3.** Univariate and multivariate Cox analyses in the subgroup of elderly patients with early-stage CRC (N= 81).

|       | Univariate OS analysis |                 |  |              | Multivariate OS Cox analysis |                |  |              |
|-------|------------------------|-----------------|--|--------------|------------------------------|----------------|--|--------------|
|       | HR                     | 95% CI          |  | Significance | HR                           | 95% CI         |  | Significance |
| Stage |                        |                 |  | <b>0.041</b> |                              |                |  | 0.173        |
| II    | 1.000                  |                 |  |              | 1.000                        |                |  |              |
| III   | 3.068                  | 1.046 to 8.998  |  |              | 2.158                        | 0.714 to 6.524 |  |              |
| ECOG  |                        |                 |  | <b>0.001</b> |                              |                |  | <b>0.004</b> |
| 0-1   | 1.000                  |                 |  |              | 1.000                        |                |  |              |
| 2-3   | 2.477                  | 1.474 to 4.162  |  |              | 2.223                        | 1.294 to 3.819 |  |              |
| T     |                        |                 |  | 0.470        |                              |                |  | -            |
| 1-2   | 1.000                  |                 |  |              |                              |                |  |              |
| >2    | 1.292                  | 0.644 to 2.593  |  |              | -                            | -              |  |              |
| N     |                        |                 |  | 0.165        |                              |                |  | -            |
| 0-1   | 1.000                  |                 |  |              |                              |                |  |              |
| 2-x   | 1.307                  | 0.896 to 1.908  |  |              | -                            | -              |  |              |
| SET   |                        |                 |  | <b>0.001</b> |                              |                |  | <b>0.007</b> |
| No    | 1.000                  |                 |  |              | 1.000                        |                |  |              |
| Yes   | 4.924                  | 1.984 to 12.223 |  |              | 3.677                        | 1.438 to 9.400 |  |              |

OS: overall survival; CI: confidence interval, HR: hazard ratio.

**Table S4.** Clinical and molecular characteristics of the subgroup of 29 cases with both SET and miR-199b data.

|                       |        | No. (%) |        |
|-----------------------|--------|---------|--------|
| Sex                   |        |         |        |
|                       | Male   | 21      | (72.4) |
|                       | Female | 8       | (27.6) |
| Age                   |        |         |        |
|                       | <70    | 10      | (38.5) |
|                       | ≥70    | 16      | (61.5) |
| T                     |        |         |        |
|                       | 1      | 0       | (0)    |
|                       | 2      | 6       | (20.7) |
|                       | 3      | 17      | (58.6) |
|                       | 4      | 5       | (17.2) |
|                       | x      | 1       | (3.5)  |
| N                     |        |         |        |
|                       | 0      | 10      | (34.5) |
|                       | 1      | 11      | (37.9) |
|                       | 2      | 7       | (24.1) |
|                       | x      | 1       | (3.5)  |
| Stage                 |        |         |        |
|                       | I-II   | 10      | (34.4) |
|                       | III    | 19      | (65.6) |
| Site of primary tumor |        |         |        |
|                       | Colon  | 20      | (69)   |
|                       | Rectum | 9       | (31)   |
| SET                   |        |         |        |
|                       | Low    | 22      | (75.9) |
|                       | High   | 7       | (24.1) |

**Table S5.** Statistical correlation between SET overexpression and miR-199b downregulation in 29 early-stage CRC.

|          |       | SET     |          | <i>p</i>     |
|----------|-------|---------|----------|--------------|
|          | Total | Low (%) | High (%) |              |
| MiR-199b | 29    | 22      | 7        | <b>0.010</b> |
| Low      | 4     | 1 (25)  | 3 (75)   |              |
| High     | 25    | 21 (84) | 4 (16)   |              |
